# Supplementary material
Source: publisher site journal article supplement (https://www.dovepress.com/article/225807)
Supplement: Supplementary file 1 [file get_supplementary_file.php]

ORIGINAL RESEARCH

**Supplementary materials**

# Multifunctional immunoliposomes combining catalase and PD-L1 antibodies overcome tumor hypoxia and enhance immunotherapeutic effects against melanoma

Yu Hei1,BingHong Teng 2,3, ZiQian Zeng2,3,SiQi Zhang3,Qian Li3,JiJia Pan3,ZuYuan Luo3, ChunYang Xiong1,*,ShiCheng Wei2,3,*

1 Department of Mechanics and Engineering Science, College of Engineering, Peking University, Beijing, China;

2 Department of Oral and Maxillofacial Surgery, School and Hospital of Stomatology, Peking University, Beijing, China;

3 Laboratory of Biomaterials and Regenerative Medicine, Academy for Advanced Interdisciplinary Studies, Peking University, Beijing, China.

*Correspondence: Prof. ChunYang Xiong

Department of Mechanics and Engineering Science, College of Engineering,Peking University, Beijing, China.

Tel: +86 10 62757940

Email : cyxiong@pku.edu.cn

*Correspondence: Prof. ShiCheng Wei

Department of Oral and Maxillofacial Surgery, School and Hospital of Stomatology, Peking University, Beijing, China

Tel: +86 10 82195780

Email : [sc-wei@pku.edu.cn](mailto:sc-wei@pku.edu.cn)


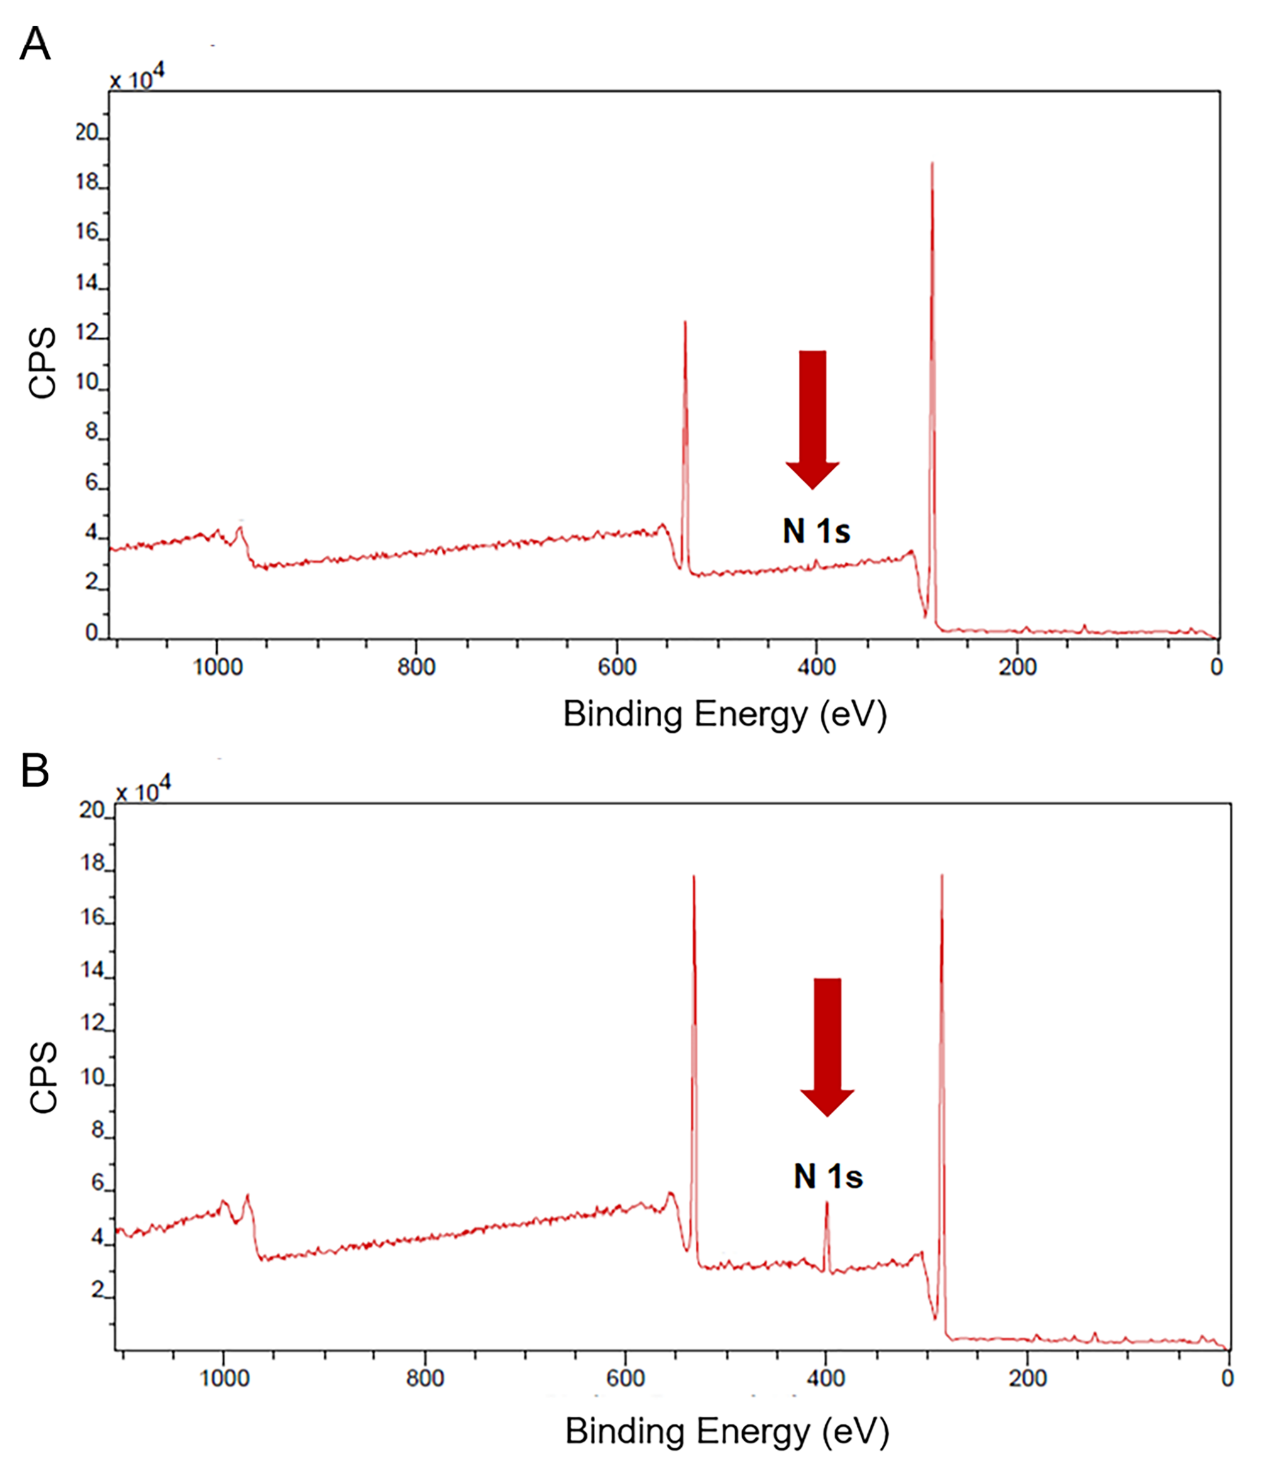


**Figure S1**. X-ray photoelectron spectra and N1s peaks of different groups.

**Notes :** (A) DSPE-PEG2000 and aPDL1. (B) DSPE-PEG2000-NHS and aPDL1.

**Abbreviations:** aPDL1, programmed death ligand 1 monoclonal antibody; DSPE-PEG2000, Distearoylphosphatidylethanoloamine-methoxy-polyethylene glycol MW:2000; DSPE-PEG2000-NHS, 1,2-distearoyl-sn-glycero-3-phosphoethanolamine-N- [succinimidyl(polyethylene glycol)]


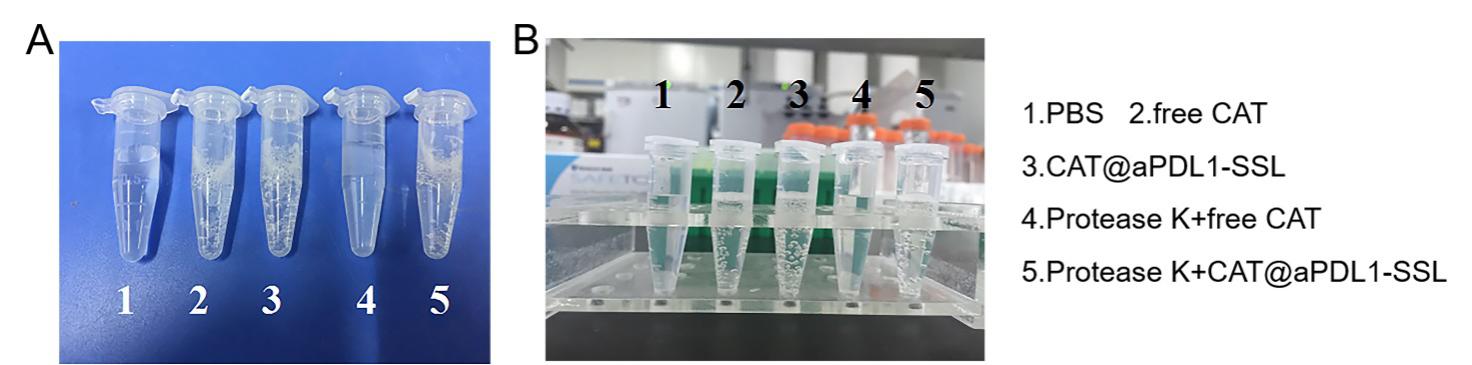


**Figure S2 A,B** O2 production by free CAT and CAT@aPDL1-SSLs in H2O2 solution under different conditions.

**Abbreviations :** CAT, catalase; CAT@aPDL1-SSLs ,CAT-loaded immunoliposomes.


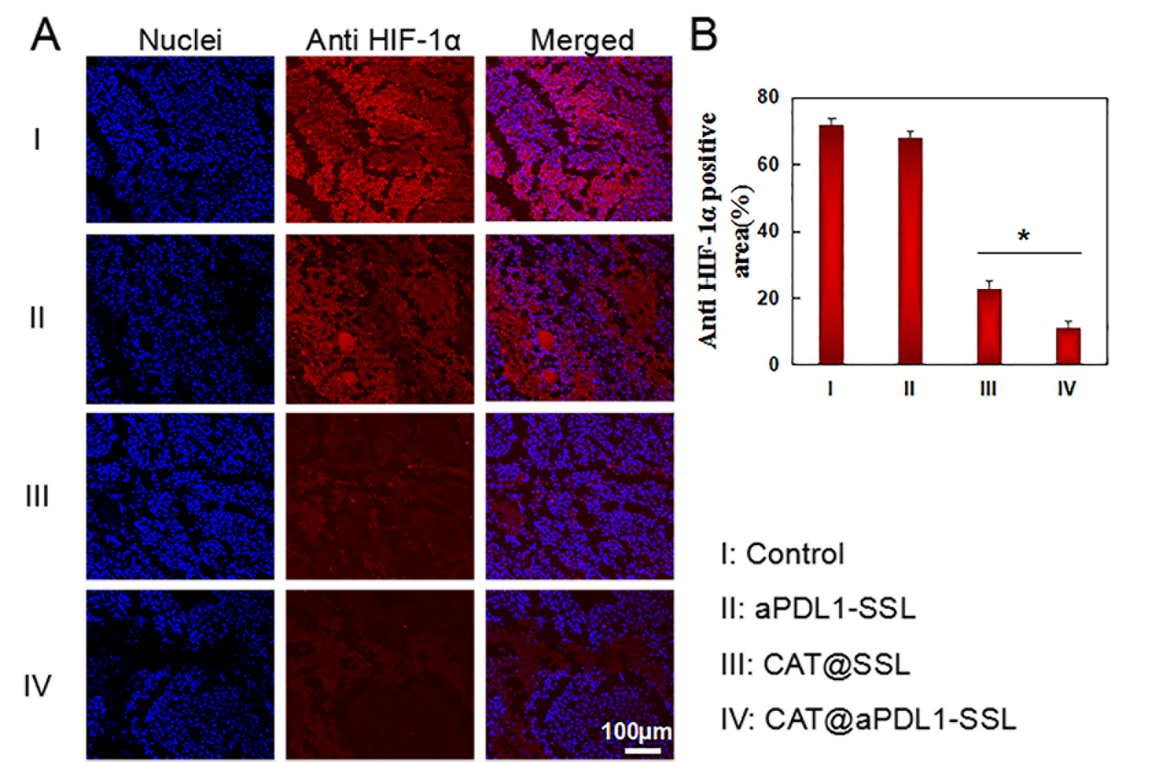


**Figure S3 A,B** Effects of control (PBS), aPDL1-SSLs, CAT@SSLs, and CAT@aPDL1-SSLs on tumor hypoxia status.

**Notes:**(A) Immunofluorescence images of tumor slices harvested from B16-F10 tumor-bearing mice following intravenous injection with four different formulations. The blue signals represent nuclei stained by DAPI and the red signals represent HIF-1α protein stained by anti-HIF-1α antibody, respectively. (B) The quantitative results of HIF-1α positive areas analyzed using Image J software based on the images shown in (A). (n = 3, results are means ± S.D. ,Scale bar: 100 μm,* P < 0.05)

**Abbreviations :** aPDL1, programmed death ligand 1 monoclonal antibody; CAT, catalase; SSL, sterically stabilized liposome; aPDL1-SSLs, aPDL1 modified immunoliposomes; CAT@aPDL1-SSLs, CAT-loaded immunoliposomes.


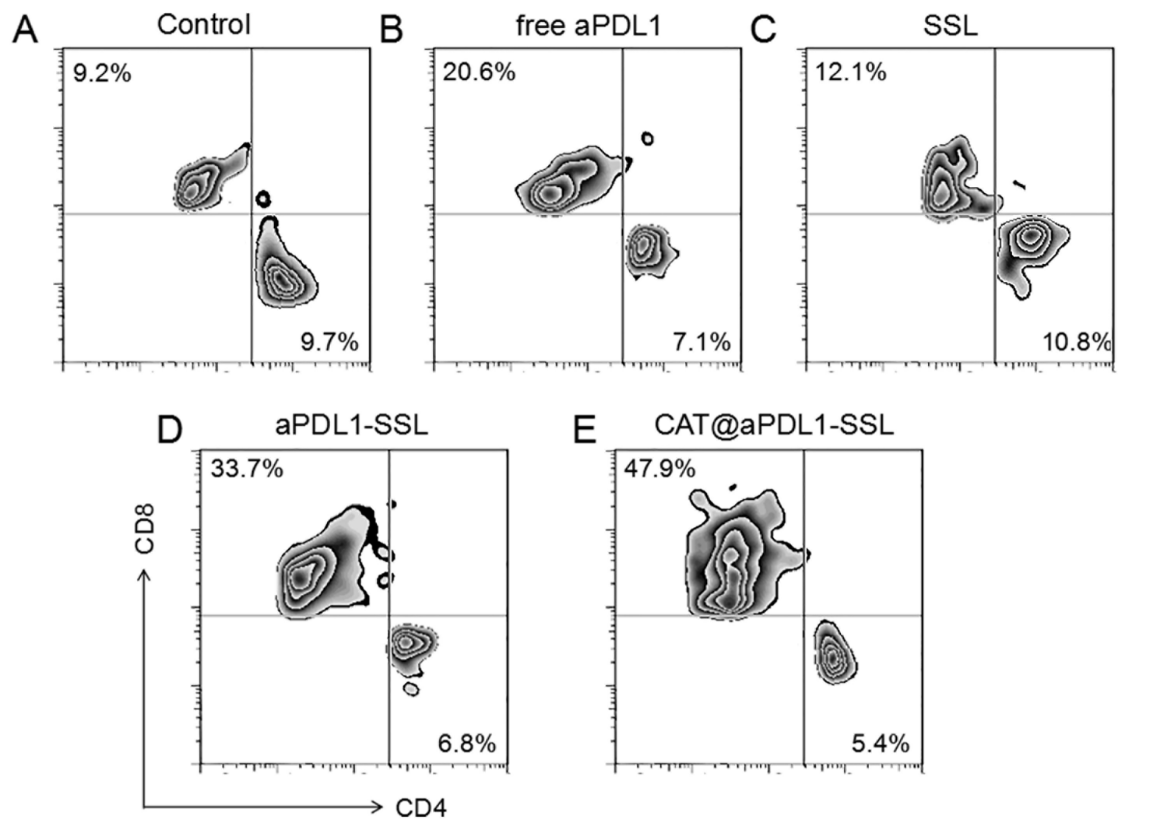


**Figure S4 A-E.** Flow cytometry analysis of CD8+ and CD4+ tumor infiltrating T cells.

**Abbreviations :** aPDL1, programmed death ligand 1 monoclonal antibody; CAT, catalase; SSL, sterically stabilized liposome; aPDL1-SSLs, aPDL1 modified immunoliposomes; CAT@aPDL1-SSLs, CAT-loaded immunoliposomes.
